# Supplementary material
Source: PubMed Central journal article supplement (PMC3256009)
Supplement: supp_56.1.197_SupplementalMaterial2.pdf [file supp_56.1.197_SupplementalMaterial2.pdf]

Table 1. Genotypes and phenotypes of CMV *pol* mutants

| BAC <sup>1</sup>                                           | Virus <sup>2</sup> | Genotype <sup>3</sup> |                     | Cyclopropavir phenotype          |                 |                                          |                | EC50 ratio (fold change) <sup>8</sup> |            |     |
|------------------------------------------------------------|--------------------|-----------------------|---------------------|----------------------------------|-----------------|------------------------------------------|----------------|---------------------------------------|------------|-----|
|                                                            |                    | UL97                  | <i>pol</i>          | EC50, $\mu\text{M}$ <sup>4</sup> | SD <sup>5</sup> | EC50 ratio <sup>6</sup><br>(fold change) | N <sup>7</sup> | GCV                                   | FOS        | CDV |
| <b>Control strains</b>                                     |                    |                       |                     |                                  |                 |                                          |                |                                       |            |     |
|                                                            | T2211              | (baseline)            | (baseline)          | 0.24                             | 0.05            |                                          | 55             |                                       |            |     |
| BA29                                                       | T3261              | (baseline)            | (baseline)          | 0.21                             | 0.06            |                                          | 24             |                                       |            |     |
| BA31                                                       | T3265              | (baseline)            | (baseline)          | 0.24                             | 0.06            |                                          | 41             |                                       |            |     |
| BA27                                                       | T3259              | <b>C592G</b>          |                     | 0.65                             | 0.15            | <b>3.1</b>                               | 26             | 3.0                                   |            |     |
| <b>Exonuclease mutants</b>                                 |                    |                       |                     |                                  |                 |                                          |                |                                       |            |     |
|                                                            | T2293              |                       | N408K               | 0.14                             | 0.06            | 0.6                                      | 15             | 4.2                                   | 0.7        | 21  |
| BA35                                                       | T3267              |                       | F412L               | 0.11                             | 0.04            | 0.5                                      | 11             | 4.6                                   | 1.1        | 9.4 |
|                                                            | T3005              |                       | P522A               | 0.12                             | 0.05            | 0.5                                      | 7              | 3.0                                   | 1.0        | 4.1 |
| BA96                                                       | T3400              |                       | L545W               | 0.14                             | 0.05            | 0.6                                      | 14             | 4.9                                   | 1.3        | 6.3 |
| <b>Amino terminal catalytic domain mutants</b>             |                    |                       |                     |                                  |                 |                                          |                |                                       |            |     |
| BA112                                                      | T3426              |                       | <b>Q578H</b>        | 1.51                             | 0.16            | <b>6.3</b>                               | 7              | 3.3                                   | <b>4.5</b> | 2.3 |
| BA103                                                      | T3408              |                       | D588N               | 0.41                             | 0.09            | 1.7                                      | 14             | 2.0                                   | <b>2.8</b> | 1.3 |
| <b>Catalytic (palm1) domain mutants</b>                    |                    |                       |                     |                                  |                 |                                          |                |                                       |            |     |
| BA143                                                      | T3525              |                       | P744T               | 0.23                             | 0.07            | 1.0                                      | 11             | 0.9                                   | 1.1        | 1.1 |
| BA189                                                      | T3658              |                       | <b>E756D</b>        | 0.74                             | 0.11            | <b>3.1</b>                               | 10             | 1.1                                   | <b>2.7</b> | 1.1 |
| BA116                                                      | T3430              |                       | <b>E756K</b>        | 0.66                             | 0.10            | <b>2.8</b>                               | 8              | 1.9                                   | <b>3.5</b> | 1.7 |
| <b>Catalytic (finger) domain mutants (regions VI, III)</b> |                    |                       |                     |                                  |                 |                                          |                |                                       |            |     |
| BA108                                                      | T3417              |                       | <b>V781I</b>        | 0.69                             | 0.20            | <b>2.9</b>                               | 9              | 2.4                                   | <b>3.9</b> | 1.5 |
|                                                            | T2417              |                       | <b>A809V</b>        | 0.70                             | 0.15            | <b>2.9</b>                               | 10             | 2.4                                   | <b>3.3</b> | 1.9 |
|                                                            | T2784              | <b>C592G</b>          | <b>A809V</b>        | 1.58                             | 0.52            | <b>6.6</b>                               | 8              | 5.6                                   | <b>3.3</b> | 2.1 |
|                                                            | T2542              |                       | <b>T813S</b>        | 1.89                             | 0.59            | <b>7.9</b>                               | 9              | 2.5                                   | <b>4.9</b> | 2.7 |
|                                                            | T2798              | <b>C592G</b>          | <b>T813S</b>        | 3.09                             | 0.55            | <b>13</b>                                | 9              | 6.0                                   | <b>5.0</b> | 1.7 |
| <b>Catalytic (palm2) domain mutants (region III)</b>       |                    |                       |                     |                                  |                 |                                          |                |                                       |            |     |
|                                                            | T2291              |                       | <b>A834P</b>        | 1.35                             | 0.48            | <b>5.6</b>                               | 16             | 5.4                                   | <b>6.4</b> | 3.0 |
|                                                            | T2311              |                       | N408K, <b>A834P</b> | 0.61                             | 0.25            | <b>2.5</b>                               | 13             | 23                                    | <b>7.2</b> | 19  |
|                                                            | T2420              |                       | <b>G841A</b>        | 3.16                             | 0.59            | <b>13</b>                                | 8              | 3.2                                   | <b>4.3</b> | 2.6 |
|                                                            | T2817              | <b>C592G</b>          | <b>G841A</b>        | 6.07                             | 1.74            | <b>25</b>                                | 11             | 7.6                                   | <b>5.2</b> | 3.0 |
|                                                            | T2483              |                       | <b>M844T</b>        | 0.98                             | 0.30            | <b>4.1</b>                               | 14             | 1.4                                   | <b>2.5</b> | 1.3 |
|                                                            | T2785              | <b>C592G</b>          | <b>M844T</b>        | 2.03                             | 0.48            | <b>8.5</b>                               | 16             | 2.5                                   | <b>2.0</b> | 1.2 |
| BA187                                                      | T3652              |                       | <b>M844V</b>        | 1.06                             | 0.15            | <b>4.4</b>                               | 10             | 2.3                                   | <b>2.2</b> | 1.6 |
| <b>Catalytic (thumb) domain mutants (region V)</b>         |                    |                       |                     |                                  |                 |                                          |                |                                       |            |     |
|                                                            | T2222              |                       | 981-2del            | 0.33                             | 0.08            | 1.4                                      | 8              | 4.8                                   | <b>3.5</b> | 4.1 |
|                                                            | T2261              | <b>C592G</b>          | 981-2del            | 0.65                             | 0.19            | <b>2.7</b>                               | 16             | 17                                    | <b>4.1</b> | 5.7 |
| BA115                                                      | T3429              |                       | A987G               | 0.12                             | 0.04            | 0.5                                      | 7              | 6.2                                   | 0.9        | 5.3 |

Table footnotes:

1. Bacterial artificial chromosome name
2. Recombinant virus strain
3. Amino acid change in recombinant virus
4. By SEAP yield reduction assay, mean value of the number of assays shown
5. Standard deviation of the number of assays shown
6. Ratio of mean EC50 value to that of matching control with baseline genotype  
Items shown in **bold** have CPV EC50 ratio >1.9
7. Number of assays (replicates performed over at least 4 independent assay setups)
8. EC50 ratios for recombinant viruses containing the same mutation(s)  
Values are previously published except for data from Table 2.  
Items shown in **bold** have FOS EC50 ratio >1.9
